# Supplementary material for: Effect of increased temperature on carbon and nitrogen uptake oftwo intertidal foraminifera ( Ammonia tepida and Haynesinagermanica )
Source: Copernicus journal article supplement (doi:10.5194/bg-2016-509), 2016-11-28
Supplement: Supplementary file 1 [file bg-2016-509-supplement.pdf]

LABELS

|     |                     |
|-----|---------------------|
| 2d  | 2 days              |
| 4d  | 4 days              |
| 7d  | 7 days              |
| 14d | 14 days             |
| 1   | 20°C                |
| 2   | 25°C                |
| 3   | 30°C                |
| A   | Haynesina germanica |
| B   | Ammonia tepida      |

| Background          | d 15N/14N  | AT% 15N/14N | d 13C/12C | AT% 13C/12C | µg N   | µg C    |
|---------------------|------------|-------------|-----------|-------------|--------|---------|
| Haynesina           | 12.582     | 0.371       | -13.559   | 1.091       | 4.200  | 21.280  |
| Ammonia             | 13.384     | 0.371       | -13.946   | 1.090       | 7.040  | 29.410  |
| Dunaliella          | 16.219     | 0.372       | -18.302   | 1.086       | 16.102 | 108.577 |
| Dunaliella gelabelt | 213298.303 | 44.067      | 30267.746 | 25.895      | 3.394  | 20.621  |
| Dunaliella excess   |            | 43.694      |           | 24.809      |        |         |

| Sample  | Nr/Ind | [mg]  | d 15N/14N | AT% 15N/14N | d 13C/12C | AT% 13C/12C | µg N  | µg C   |
|---------|--------|-------|-----------|-------------|-----------|-------------|-------|--------|
| 2d1A 1  | 60     | 0.756 | 1000.814  | 0.750       | 213.606   | 1.339       | 3.947 | 18.927 |
| 2d1A 2  | 60     | 0.781 | 1173.972  | 0.816       | 275.725   | 1.406       | 3.988 | 19.687 |
| 2d1A 3  | 60     | 0.782 | 1087.006  | 0.783       | 255.116   | 1.384       | 3.886 | 17.832 |
| 2d2A 1  | 60     | 0.764 | 662.588   | 0.619       | 90.085    | 1.204       | 4.493 | 21.734 |
| 2d2A 2  | 60     | 0.807 | 856.361   | 0.692       | 128.227   | 1.246       | 4.610 | 23.608 |
| 2d2A 3  | 60     | 0.788 | 833.492   | 0.682       | 134.713   | 1.253       | 5.075 | 23.354 |
| 2d3A 1  | 60     | 0.813 | 919.805   | 0.714       | 120.208   | 1.237       | 5.506 | 25.591 |
| 2d3A 2  | 60     | 0.857 | 855.848   | 0.689       | 119.409   | 1.236       | 5.923 | 26.739 |
| 2d3A 3  | 60     | 0.805 | 860.459   | 0.693       | 108.956   | 1.225       | 4.946 | 24.154 |
| 4d1A 1  | 60     | 0.848 | 1340.026  | 0.877       | 238.950   | 1.366       | 4.424 | 22.032 |
| 4d1A 2  | 60     | 0.863 | 1594.931  | 0.972       | 305.002   | 1.438       | 4.643 | 22.662 |
| 4d1A 3  | 60     | 0.836 | 1421.481  | 0.905       | 306.979   | 1.440       | 4.969 | 19.962 |
| 4d2A 1  | 60     | 0.912 | 1150.715  | 0.802       | 133.322   | 1.251       | 5.196 | 24.930 |
| 4d2A 2  | 60     | 0.907 | 853.410   | 0.690       | 108.051   | 1.224       | 5.239 | 21.106 |
| 4d2A 3  | 60     | 0.895 | 1036.334  | 0.761       | 119.544   | 1.236       | 4.515 | 19.653 |
| 4d3A 1  | 60     | 0.835 | 759.148   | 0.655       | 90.264    | 1.204       | 4.920 | 18.413 |
| 4d3A 2  | 60     | 0.869 | 740.376   | 0.646       | 83.114    | 1.196       | 5.676 | 17.910 |
| 4d3A 3  | 60     | 0.872 | 877.271   | 0.699       | 77.970    | 1.191       | 4.897 | 19.885 |
| 7d1A 1  | 60     | 0.807 | 1922.551  | 1.096       | 243.137   | 1.371       | 4.448 | 21.730 |
| 7d1A 2  | 34     | 0.881 | 1387.176  | 0.894       | 204.765   | 1.329       | 4.146 | 16.494 |
| 7d1A 3  | 60     | 0.959 | 1833.909  | 1.059       | 242.004   | 1.370       | 5.089 | 24.656 |
| 7d2A 1  | 60     | 0.966 | 1201.706  | 0.820       | 97.767    | 1.212       | 5.400 | 22.302 |
| 7d2A 2  | 60     | 0.917 | 1496.588  | 0.933       | 165.414   | 1.286       | 4.882 | 21.196 |
| 7d2A 3  | 60     | 1.021 | 1462.797  | 0.918       | 101.349   | 1.216       | 5.419 | 24.629 |
| 7d3A 1  | 60     | 0.801 | 1290.968  | 0.853       | 101.206   | 1.216       | 5.507 | 22.955 |
| 7d3A 2  | 60     | 0.778 | 1640.647  | 0.991       | 98.998    | 1.214       | 4.362 | 21.246 |
| 7d3A 3  | 60     | 0.727 | 1798.322  | 1.052       | 88.309    | 1.202       | 4.157 | 20.699 |
| 14d1A 1 | 60     | 0.816 | 2229.201  | 1.214       | 197.855   | 1.322       | 4.186 | 20.573 |
| 14d1A 2 | 60     | 0.841 | 2603.365  | 1.349       | 193.257   | 1.317       | 4.868 | 24.820 |
| 14d1A 3 | 60     | 0.799 | 2615.028  | 1.361       | 234.561   | 1.361       | 4.077 | 20.866 |
| 14d2A 1 | 60     | 0.853 | 2501.750  | 1.315       | 77.810    | 1.191       | 4.432 | 20.585 |

|         |    |       |           |        |          |        |       |        |
|---------|----|-------|-----------|--------|----------|--------|-------|--------|
| 14d2A 2 | 60 | 0.832 | 2010.575  | 1.125  | 95.999   | 1.211  | 5.188 | 19.622 |
| 14d2A 3 | 60 | 0.796 | 2371.836  | 1.272  | 102.330  | 1.217  | 3.887 | 17.669 |
| 14d3A 1 | 60 | 0.907 | 2530.373  | 1.315  | 91.387   | 1.205  | 5.699 | 26.080 |
| 14d3A 2 | 60 | 0.852 | 2618.391  | 1.349  | 113.097  | 1.229  | 5.589 | 23.808 |
| 14d3A 3 | 60 | 0.836 | 2712.978  | 1.389  | 75.371   | 1.188  | 4.880 | 22.911 |
| 2d1B 1  | 50 | 1.044 | 7032.847  | 2.869  | 1990.677 | 3.235  | 6.101 | 29.382 |
| 2d1B 2  | 50 | 1.073 | 8857.513  | 3.499  | 1463.140 | 2.680  | 5.679 | 34.935 |
| 2d1B 3  | 50 | 1.116 | 5940.778  | 2.489  | 1771.515 | 3.005  | 6.577 | 32.891 |
| 2d2B 1  | 50 | 0.967 | 4882.138  | 2.118  | 882.695  | 2.061  | 6.758 | 37.047 |
| 2d2B 2  | 50 | 0.919 | 4623.539  | 2.027  | 1263.129 | 2.468  | 5.584 | 28.132 |
| 2d2B 3  | 50 | 0.952 | 7769.387  | 3.125  | 1661.800 | 2.890  | 7.877 | 42.808 |
| 2d3B 1  | 50 | 0.998 | 4531.795  | 1.994  | 833.577  | 2.009  | 7.651 | 38.976 |
| 2d3B 2  | 50 | 1.026 | 3756.923  | 1.720  | 542.473  | 1.695  | 7.371 | 52.077 |
| 2d3B 3  | 50 | 0.915 | 4037.544  | 1.819  | 743.765  | 1.912  | 5.784 | 30.199 |
| 4d1B 1  | 31 | 0.789 | 8487.677  | 3.3721 | 1829.566 | 3.0665 | 3.245 | 15.580 |
| 4d1B 2  | 50 | 0.871 | 9684.740  | 3.781  | 1835.426 | 3.073  | 5.257 | 26.079 |
| 4d1B 3  | 50 | 0.923 | 7000.664  | 2.859  | 1151.207 | 2.349  | 6.979 | 37.033 |
| 4d2B 1  | 50 | 0.953 | 13224.130 | 4.972  | 2001.578 | 3.247  | 6.470 | 31.724 |
| 4d2B 2  | 50 | 0.997 | 8653.585  | 3.429  | 1200.409 | 2.401  | 7.625 | 37.708 |
| 4d2B 3  | 50 | 0.993 | 14831.424 | 5.503  | 2667.147 | 3.938  | 7.174 | 36.359 |
| 4d3B 1  | 50 | 0.903 | 10776.169 | 4.152  | 1359.775 | 2.570  | 6.651 | 35.823 |
| 4d3B 2  | 50 | 1.014 | 8847.320  | 3.495  | 895.745  | 2.075  | 7.128 | 44.239 |
| 4d3B 3  | 50 | 1.007 | 9759.324  | 3.807  | 1228.174 | 2.431  | 6.696 | 36.895 |
| 7d1B 1  | 49 | 0.904 | 11595.655 | 4.428  | 1247.350 | 2.451  | 5.723 | 34.129 |
| 7d1B 2  | 50 | 0.746 | 14796.889 | 5.491  | 1937.957 | 3.180  | 6.745 | 34.741 |
| 7d1B 3  | 43 | 0.821 | 12165.350 | 4.619  | 1630.926 | 2.857  | 4.251 | 20.357 |
| 7d2B 1  | 50 | 0.998 | 13276.531 | 4.989  | 1201.331 | 2.402  | 7.702 | 41.773 |
| 7d2B 2  | 50 | 0.943 | 19883.333 | 7.133  | 2094.919 | 3.344  | 7.214 | 38.608 |
| 7d2B 3  | 50 | 0.839 | 22176.790 | 7.855  | 2582.247 | 3.851  | 6.907 | 41.649 |
| 7d3B 1  | 50 | 0.990 | 13170.479 | 4.954  | 1328.475 | 2.537  | 6.687 | 33.193 |
| 7d3B 2  | 50 | 0.956 | 13682.625 | 5.124  | 1473.919 | 2.691  | 6.991 | 35.341 |
| 7d3B 3  | 50 | 0.980 | 13940.009 | 5.209  | 1575.971 | 2.799  | 7.018 | 34.663 |
| 14d1B 1 | 60 | 1.281 | 17149.893 | 6.258  | 1525.597 | 2.746  | 7.426 | 37.202 |
| 14d1B 2 | 62 | 1.277 | 19784.657 | 7.102  | 2071.612 | 3.320  | 7.934 | 37.911 |
| 14d1B 3 | 23 | 0.756 | 13755.670 | 5.148  | 2738.470 | 4.012  | 3.962 | 12.164 |
| 14d2B 1 | 42 | 0.839 | 31382.115 | 10.643 | 4127.591 | 5.422  | 4.669 | 18.576 |
| 14d2B 2 | 40 | 0.903 | 28696.706 | 9.847  | 4570.168 | 5.862  | 4.136 | 14.641 |
| 14d2B 3 | 41 | 0.825 | 24059.965 | 8.440  | 2664.113 | 3.935  | 5.193 | 23.956 |
| 14d3B 1 | 43 | 0.893 | 13886.771 | 5.191  | 1044.915 | 2.235  | 5.061 | 23.776 |
| 14d3B 2 | 45 | 0.961 | 20923.582 | 7.462  | 2445.279 | 3.709  | 6.181 | 24.229 |
| 14d3B 3 | 47 | 0.941 | 16462.557 | 6.0354 | 1453.127 | 2.669  | 5.419 | 24.920 |

#### uptake rates

| Sample | C Rates | N Rates [ng N mg <sup>-1</sup> h <sup>-1</sup> ] |
|--------|---------|--------------------------------------------------|
| 2d1A 1 | 4.992   | 0.9358                                           |
| 2d1A 2 | 6.3962  | 1.074                                            |
| 2d1A 3 | 5.3753  | 0.9687                                           |
| 2d2A 1 | 2.5915  | 0.6899                                           |

|         |        |        |
|---------|--------|--------|
| 2d2A 2  | 3.6442 | 0.8679 |
| 2d2A 3  | 3.8605 | 0.9481 |
| 2d3A 1  | 3.6997 | 1.0977 |
| 2d3A 2  | 3.6453 | 1.0388 |
| 2d3A 3  | 3.2304 | 0.935  |
| 4d1A 1  | 2.8785 | 0.6234 |
| 4d1A 2  | 3.6677 | 0.7638 |
| 4d1A 3  | 3.3556 | 0.7495 |
| 4d2A 1  | 1.7637 | 0.58   |
| 4d2A 2  | 1.2434 | 0.4348 |
| 4d2A 3  | 1.284  | 0.465  |
| 4d3A 1  | 1.0061 | 0.3951 |
| 4d3A 2  | 0.8757 | 0.4245 |
| 4d3A 3  | 0.9174 | 0.436  |
| 7d1A 1  | 1.7329 | 0.5401 |
| 7d1A 2  | 1.0252 | 0.3322 |
| 7d1A 3  | 1.6473 | 0.4931 |
| 7d2A 1  | 0.6454 | 0.3392 |
| 7d2A 2  | 1.038  | 0.4043 |
| 7d2A 3  | 0.696  | 0.3922 |
| 7d3A 1  | 0.8258 | 0.4479 |
| 7d3A 2  | 0.7718 | 0.4693 |
| 7d3A 3  | 0.7284 | 0.5259 |
| 14d1A 1 | 0.6685 | 0.2922 |
| 14d1A 2 | 0.7655 | 0.3821 |
| 14d1A 3 | 0.8123 | 0.3412 |
| 14d2A 1 | 0.2769 | 0.3311 |
| 14d2A 2 | 0.3244 | 0.3173 |
| 14d2A 3 | 0.323  | 0.297  |
| 14d3A 1 | 0.3789 | 0.4007 |
| 14d3A 2 | 0.4443 | 0.4331 |
| 14d3A 3 | 0.3061 | 0.4014 |
| 2d1B 1  | 48.557 | 6.9021 |
| 2d1B 2  | 41.639 | 7.8262 |
| 2d1B 3  | 45.409 | 5.9024 |
| 2d2B 1  | 29.931 | 5.7712 |
| 2d2B 2  | 33.922 | 4.7556 |
| 2d2B 3  | 65.101 | 10.772 |
| 2d3B 1  | 28.856 | 5.8825 |
| 2d3B 2  | 24.7   | 4.5804 |
| 2d3B 3  | 21.823 | 4.3274 |
| 4d1B 1  | 15.696 | 2.9176 |
| 4d1B 2  | 23.875 | 4.8658 |
| 4d1B 3  | 20.307 | 4.4462 |
| 4d2B 1  | 28.877 | 7.3829 |
| 4d2B 2  | 19.94  | 5.5285 |
| 4d2B 3  | 41.95  | 8.7637 |
| 4d3B 1  | 23.619 | 6.5821 |
| 4d3B 2  | 17.288 | 5.1919 |
| 4d3B 3  | 19.752 | 5.4008 |

|         |        |        |
|---------|--------|--------|
| 7d1B 1  | 11.807 | 3.4689 |
| 7d1B 2  | 22.371 | 6.2531 |
| 7d1B 3  | 10.071 | 2.9707 |
| 7d2B 1  | 12.619 | 4.814  |
| 7d2B 2  | 21.213 | 6.9875 |
| 7d2B 3  | 31.498 | 8.3227 |
| 7d3B 1  | 11.15  | 4.1816 |
| 7d3B 2  | 13.605 | 4.6948 |
| 7d3B 3  | 13.895 | 4.6799 |
| 14d1B 1 | 5.5265 | 2.3049 |
| 14d1B 2 | 7.6078 | 2.8243 |
| 14d1B 3 | 5.4025 | 1.6908 |
| 14d2B 1 | 11.022 | 3.8609 |
| 14d2B 2 | 8.8929 | 2.9314 |
| 14d2B 3 | 9.4947 | 3.4303 |
| 14d3B 1 | 3.503  | 1.8449 |
| 14d3B 2 | 7.5881 | 3.0803 |
| 14d3B 3 | 4.8061 | 2.2032 |

#### DIC

| Sample ID | delta_13 atomp_13C |        | Sample ID | O2 [mg L-1] |
|-----------|--------------------|--------|-----------|-------------|
| 2d1A      | 1922.7             | 3.1642 | 2d1A      | 5.05        |
| 2d1A      | 1742.6             | 2.975  | 2d1A      | 4.61        |
| 2d1A      | 1870.6             | 3.1095 | 2d1A      | 5.22        |
| 2d2A      | 2266.1             | 3.5229 | 2d2A      | 5.16        |
| 2d2A      | 2173.5             | 3.4264 | 2d2A      | 5.14        |
| 2d2A      | 2120               | 3.3706 | 2d2A      | 5.39        |
| 2d3A      | 2148.2             | 3.4001 | 2d3A      | 6.21        |
| 2d3A      | 2280.2             | 3.5376 | 2d3A      | 6.51        |
| 2d3A      | 1477.4             | 2.6952 | 2d3A      | <b>7.7</b>  |
